# Supplementary material for: Multiplexed Human Gene Expression Analysis Reveals a Central Role of the TLR/mTOR/PPARγ and NFkB Axes in Burn and Inhalation Injury-Induced Changes in Systemic Immunometabolism and Long-Term Patient Outcomes
Source: MDPI journal article supplement (doi:10.3390/ijms23169418), 2022-08-20
Supplement: s1 [file s1]

## Figure S1

TLR Signaling *versus* healthy

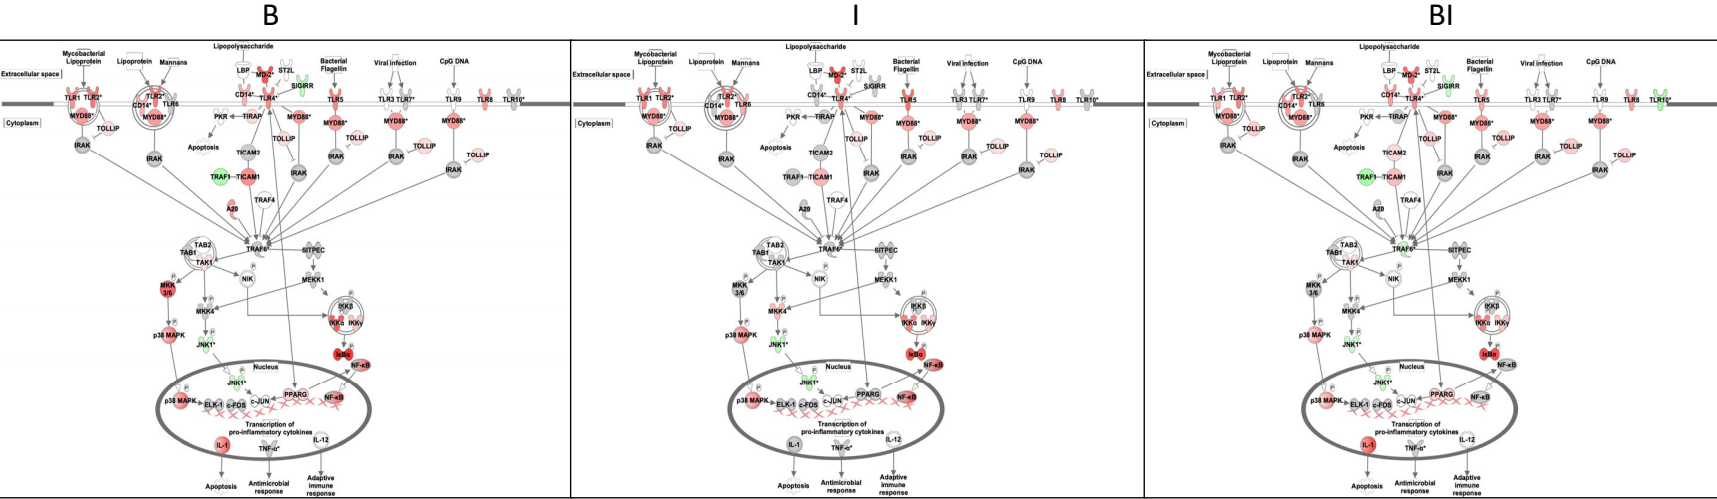

Figure S2

NF- $\kappa$ B Signaling *versus* healthy

B

I

BI

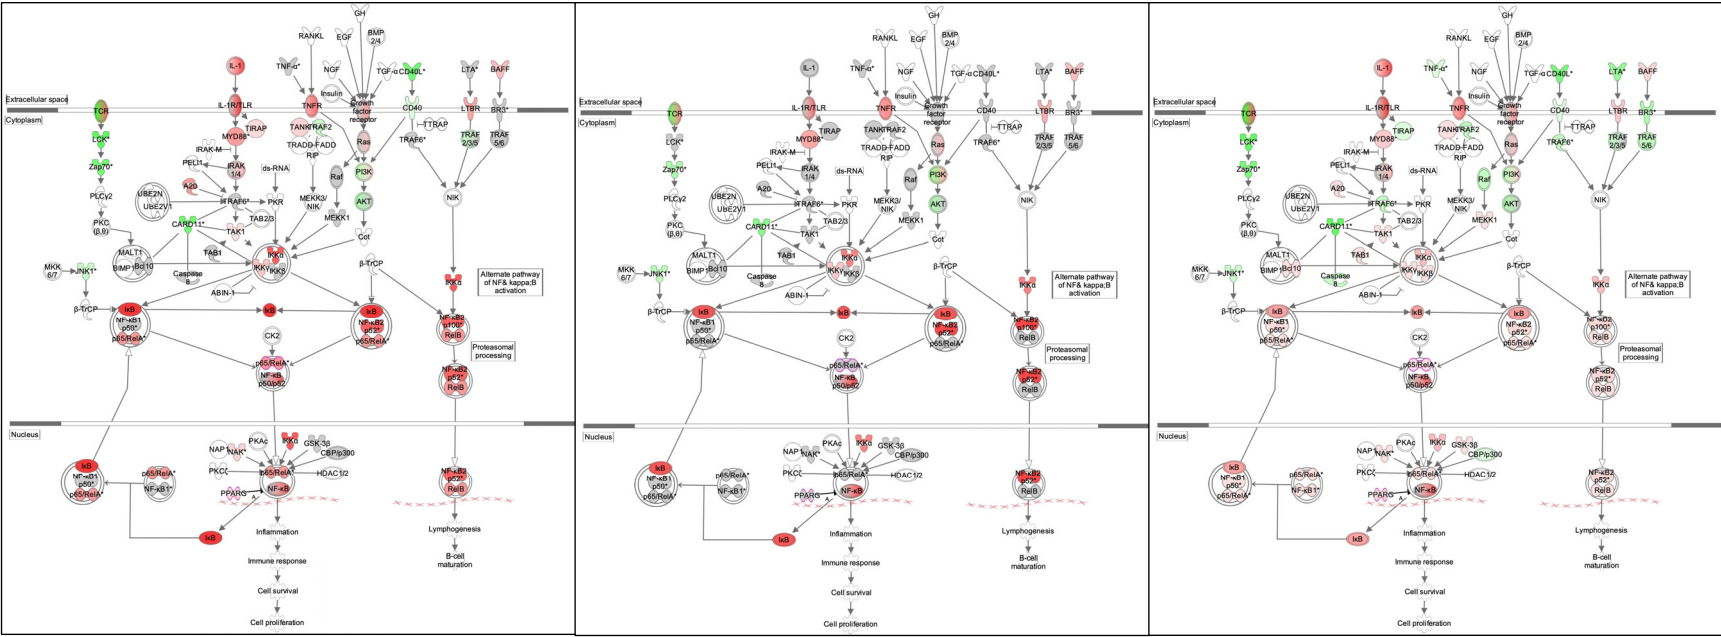

Figure S3

Sample Quantiles

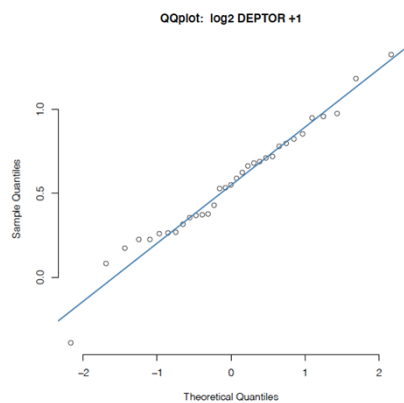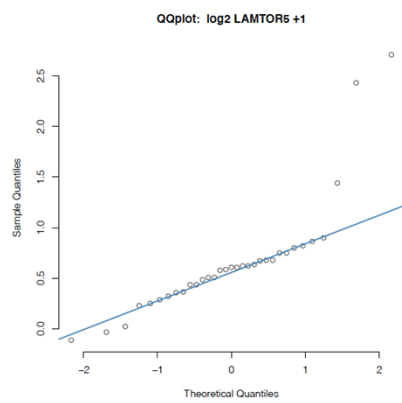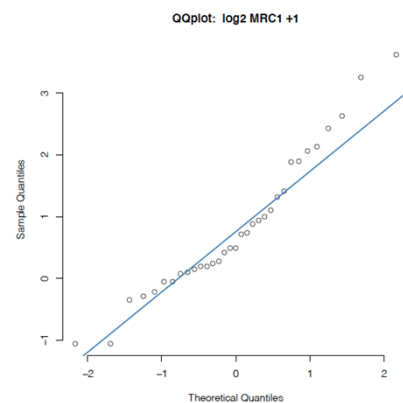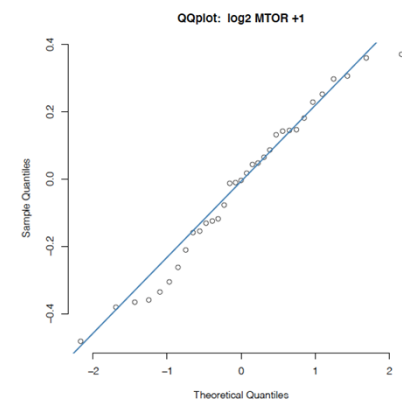

Theoretical Quantiles →

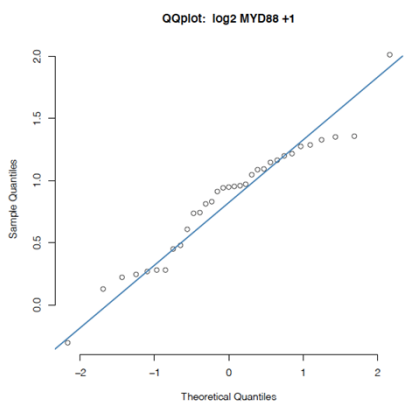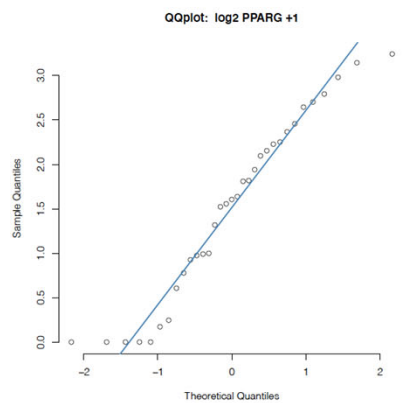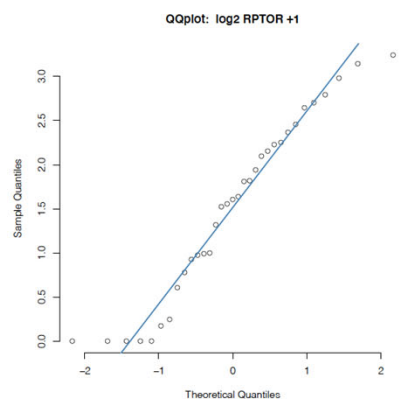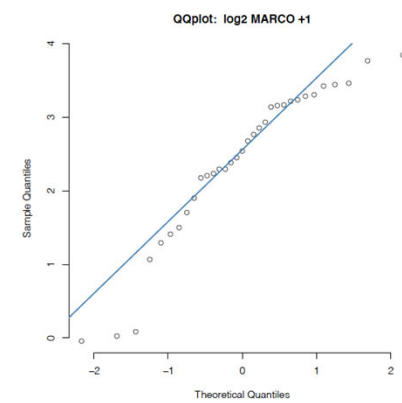

Figure S4
